# Supplementary material
Source: publisher site journal article supplement (https://www.spandidos-publications.com/5599/downloadSupplementary)
Supplement: Supplementary file 1 [file downloadSupplementary]

## Sheet: Sheet1
Table SII. A total of 20 metabolites identified in the Top 10 enriched pathways in ONT retina.
Metabolites	m/z	log2(FC)	Variable importance in projection	P-value	Trend	Area under curve
DHA(Dehydroepiandrosterone)	329.246	1.36879	1.89484	2.43006e-09	↑	1
Citrulline	176.102	1.43208	1.63183	2.99036e-07	↑	0.972222
Taurine	126.022	-2.07655	7.9747	7.15731e-06	↓	1
L-Tyrosine	180.067	0.960299	1.02748	7.88275e-06	↑	0.777778
Ribose 1-phosphate	229.012	-1.43272	1.65513	8.94242e-06	↓	1
Sedoheptulose 7-phosphate	289.033	2.19827	1.04297	1.36383e-05	↑	1
beta-D-fructose 2,6-bisphosphate	316.948	1.79768	5.29895	1.58408e-05	↑	0.916667
Riboflavin	377.145	1.44009	1.14009	1.66447e-05	↑	0.972222
D-Mannose 6-phosphate	283.018	5.98982	2.23855	0.000109662	↑	1
Deoxyribose 5-phosphate	259.022	1.57303	3.04536	0.000172882	↑	1
Uracil	113.035	-0.630131	1.12425	0.000195837	↓	1
L-Aspartic Acid	132.03	-1.35958	2.48707	0.000449691	↓	1
Taurochenodesoxycholic acid	498.29	30.2531	1.13942	0.000479345	↑	1
Spermine	203.223	-4.388	2.11922	0.000683922	↓	1
FAD（flavin adenine dinucletide）	784.15	-0.691921	1.77029	0.00069789	↓	1
Sphingosine	300.289	1.98291	2.42497	0.00102142	↑	1
Cortexolone	391.213	2.5878	1.07422	0.00142263	↑	1
Galabiosylceramide (d18:1/16:0)	900.548	-1.41688	12.1697	0.00260035	↓	1
Taurocholic acid	514.284	9.14033	2.63345	0.00829117	↑	1
Gluconic acid	195.051	1.03513	1.3857	0.0108389	↑	0.638889
